# Supplementary material for: A hierarchical porous graphene/nickel anode that simultaneously boosts the bio- and electro-catalysis for high-performance microbial fuel cells
Source: Royal Society of Chemistry journal article supplement (doi:10.1039/c4ra03082f), 2014-01-01
Supplement: c4ra03082f1.pdf [file c4ra03082f1.pdf]

## *Supporting Information*

### **Three Dimensional Porous Graphene/Nickel Anode to Simultaneously Boost the Bio- and Electro-catalysis for High Performance Microbial Fuel Cells**

Yan Qiao, Xiao-Shuai Wu, Cai-Xia Ma, Hong He, Chang Ming Li\*

Chongqing Key Laboratory for Advanced Materials & Technologies of Clean Energies, Southwest University, 1 Tiansheng Road, Chongqing 400715, China

Institute for Clean Energy & Advanced Materials, Southwest University, 1 Tiansheng Road, Chongqing 400715, China

Faculty of Materials & Energy, Southwest University, 1 Tiansheng Road, Chongqing 400715, China

E-mail: [ecmli@swu.edu.cn](mailto:ecmli@swu.edu.cn).

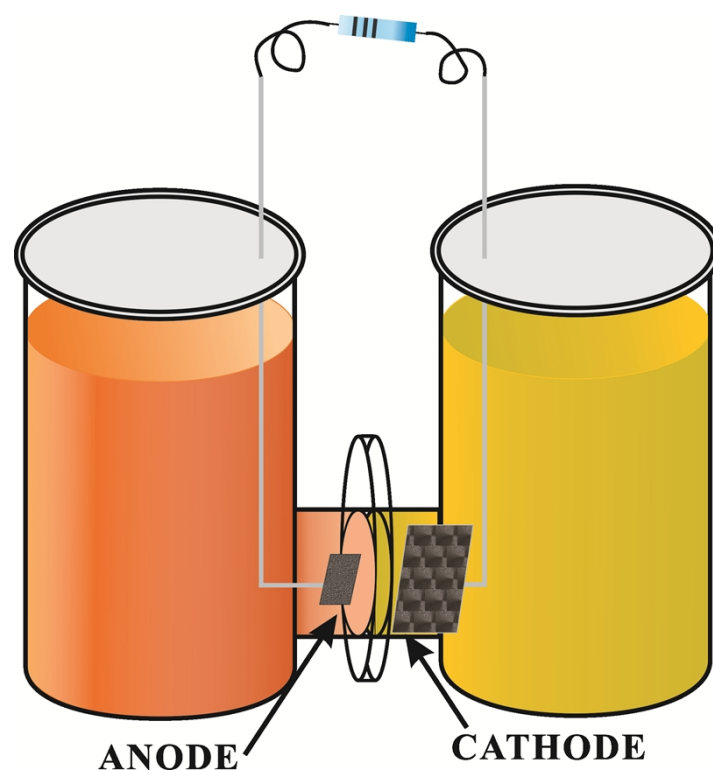

**Fig S1.** A schematic view of MFC operations.

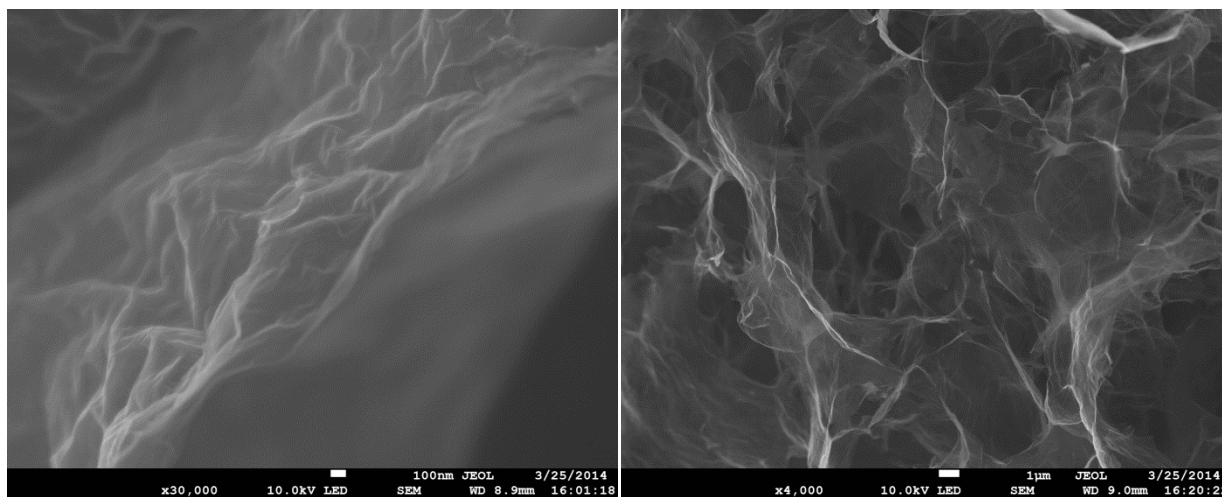

Fig S2. SEM micrographs of G/NiIII

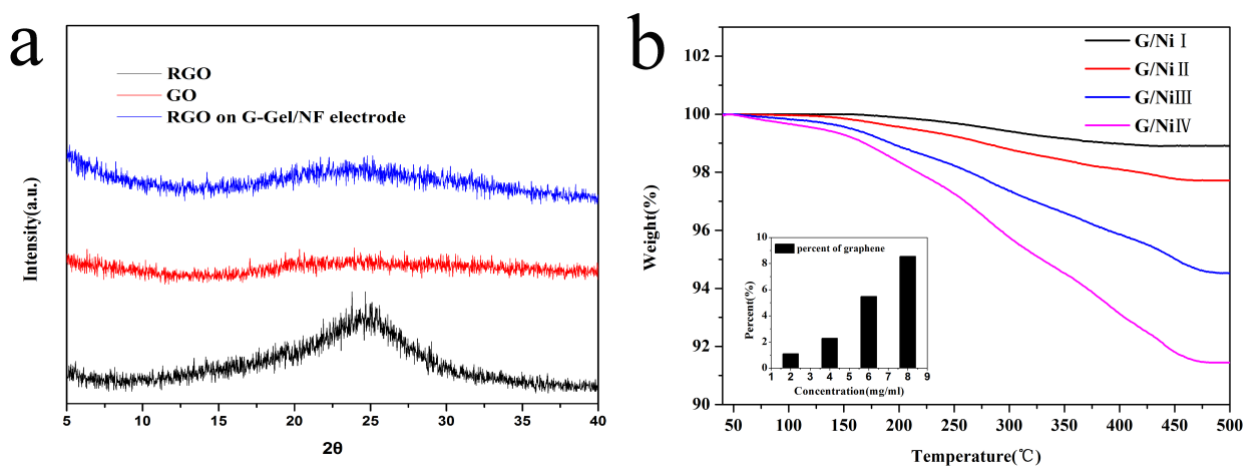

Fig S3. XRD (a) result of GO, RGO and RGO on G/Ni electrode; TGA (b) information of G/Ni at different concentration.

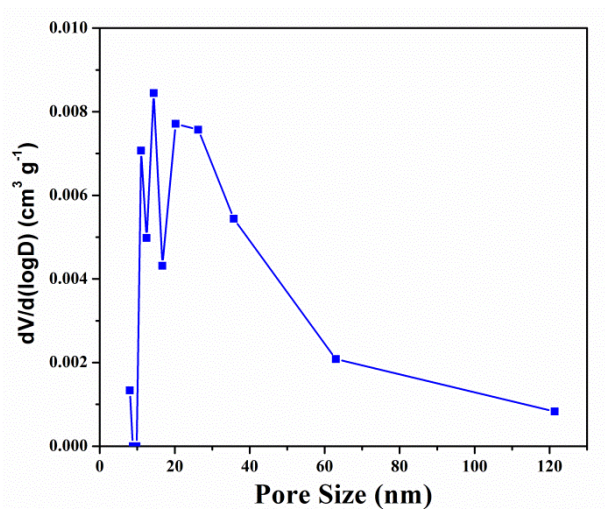

Fig S4. Pore size distribution of graphene aerogel in G/NiIII composite

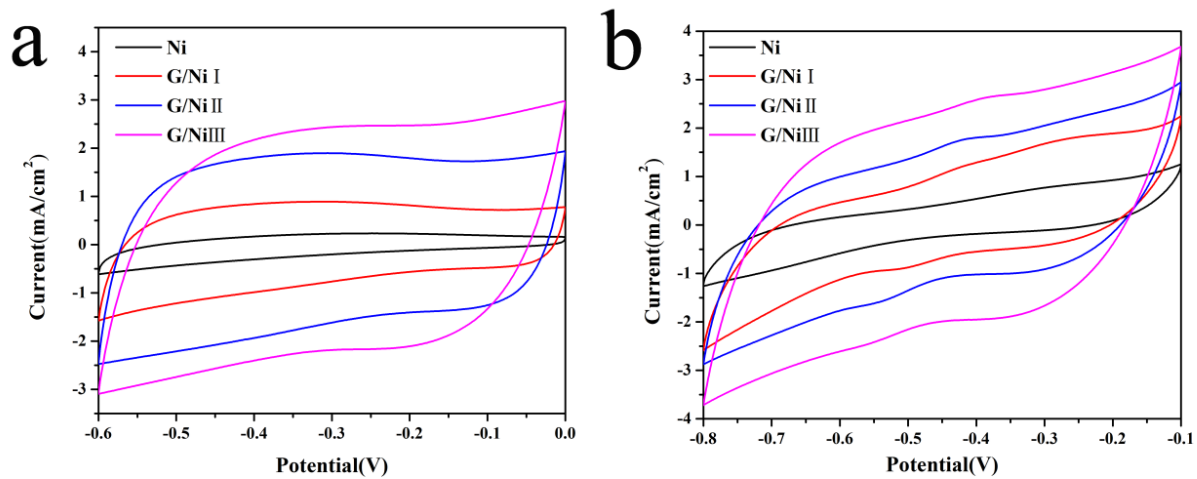

**Fig S5.** Cyclic voltammograms of G/Ni electrode conducted in 0.1 M phosphate buffered (a) and in anaerobical *S. putrefaciens* cell suspensions in phosphate buffer (b)

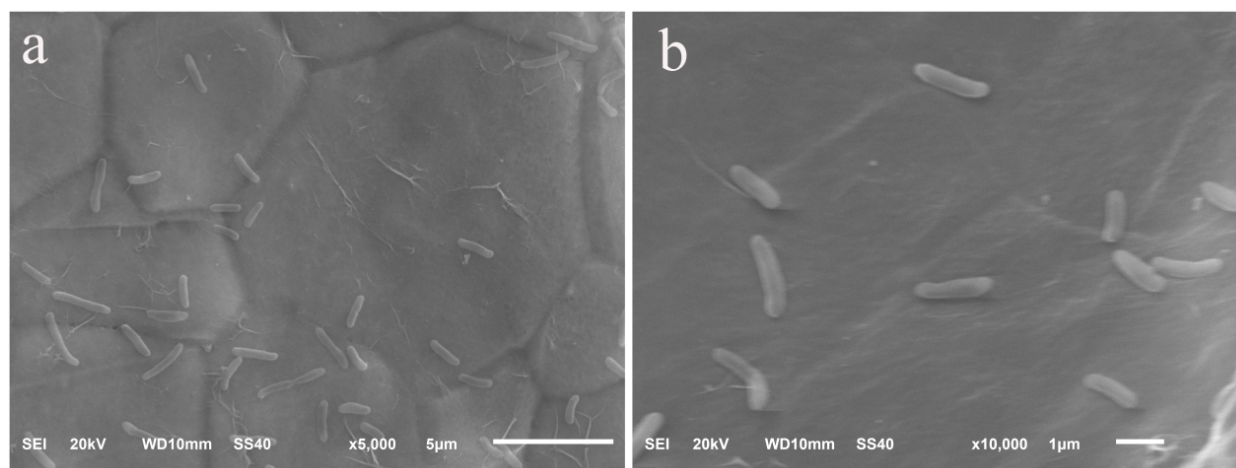

**Fig S6.** SEM micrographs of *S. putrefaciens* cells adhered on the nickel foam anode electrode surface (a: low magnification, b: high magnification)
